# Supplementary material for: A facile method for pre-insertion of cations and structural water in preparing durable zinc storage vanadate cathodes
Source: Royal Society of Chemistry journal article supplement (doi:10.1039/d2ce00609j), 2022-01-01
Supplement: d2ce00609j1.pdf [file d2ce00609j1.pdf]

Electronic Supplementary Material (ESI) for CrystEngComm.  
This journal is © The Royal Society of Chemistry

## Supporting information

# A facile method for pre-insertion of cations and structural water in preparing durable zinc storage vanadate cathodes

*Yujian Wang<sup>a, b</sup>, Shuying Wang<sup>a, b</sup>, Linyu Yang<sup>a, b\*</sup>, Fengjun Zhao<sup>c</sup>, Haibing Li<sup>d</sup>,*

<sup>a</sup> Xinjiang Key Laboratory of Solid State Physics and Devices, Xinjiang University,  
Urumqi 830046, PR China. E-mail: yanglinyu0222@sina.com

<sup>b</sup> School of physics and technology, Xin Jiang University, Urumqi, Xinjiang 830046,  
China.

<sup>c</sup> School of Materials Science and Engineering, Central South University, Changsha,  
Hunan 410083, China

<sup>d</sup> Xinjiang Uygur Autonomous Region Research Institute of Measurement and Testing,  
Urumqi 830011, China

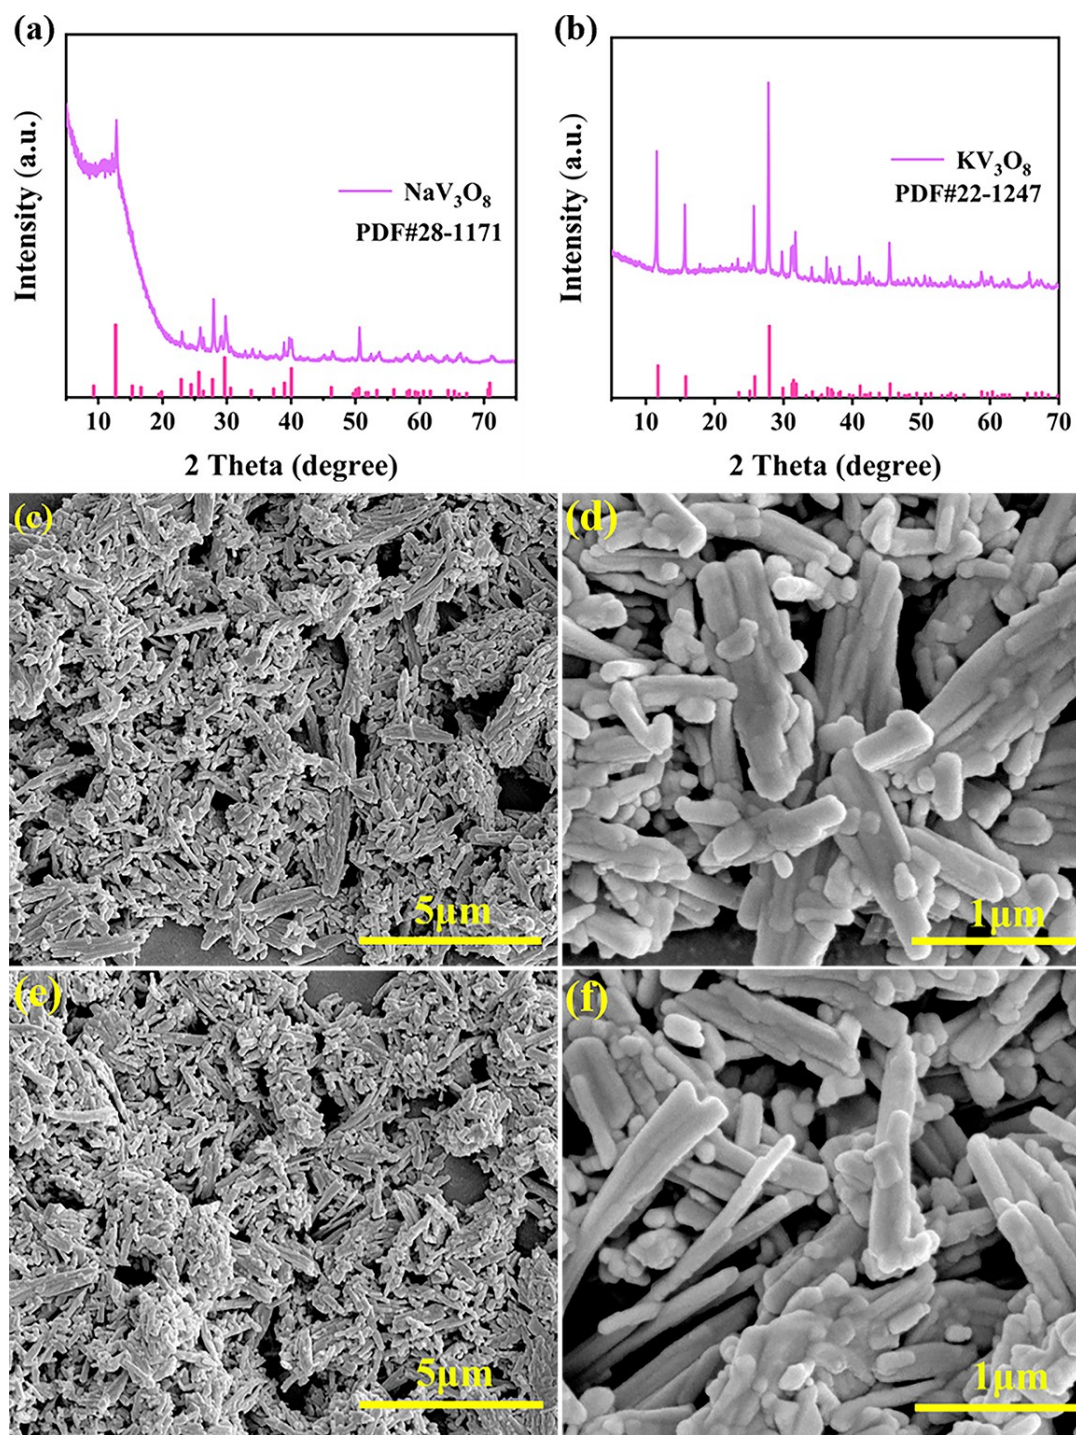

**Fig. S1** (a) The XRD pattern of  $\text{NaV}_3\text{O}_8$ . (b) the XRD pattern of  $\text{KV}_3\text{O}_8$ . (c-d) The SEM images of  $\text{NaV}_3\text{O}_8$ . (e-f) The SEM images of  $\text{KV}_3\text{O}_8$ .

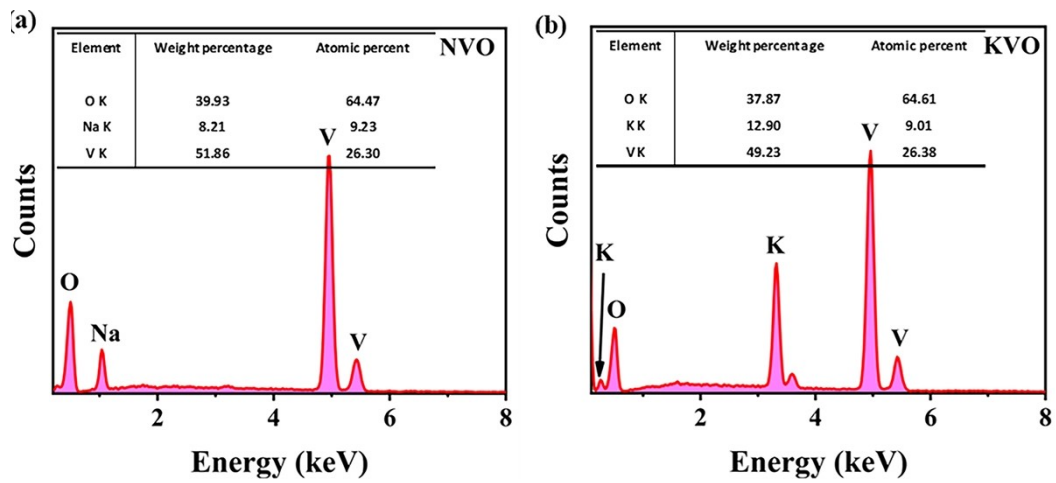

Fig. S2 (a), and (b) are the EDS of the NVO and KVO cathodes, respectively

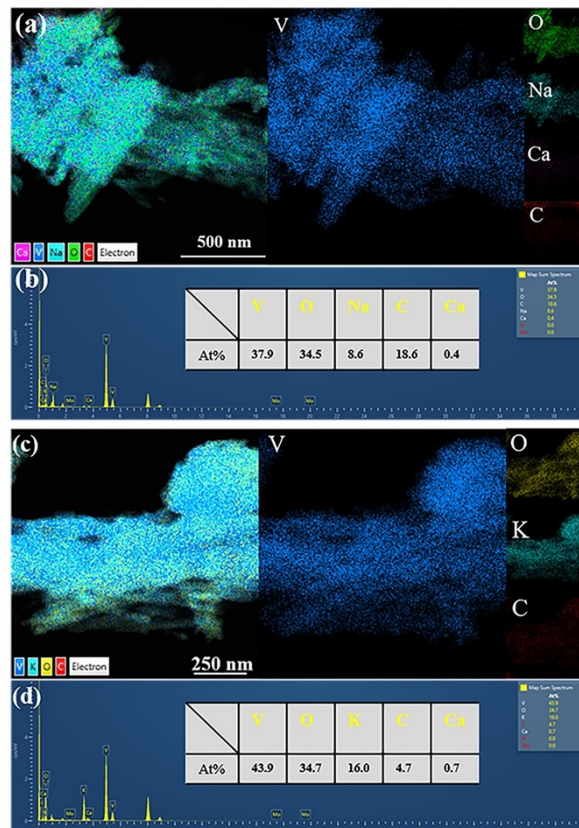

Fig. S3 (a) TEM elemental maps of NVO. (b) EDS of NVO taken from TEM test. (c) TEM elemental maps of KVO. (d) EDS of KVO taken from TEM test.

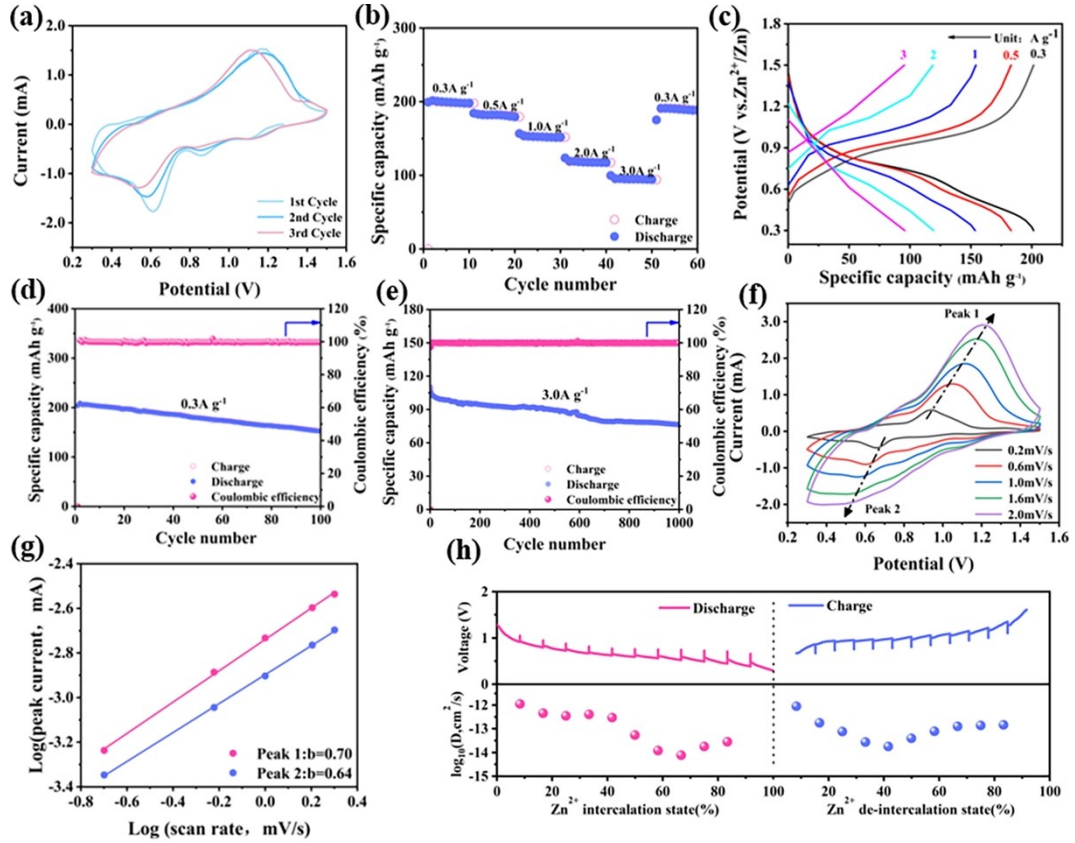

**Fig. S4** Electrochemical characterization of the NaV<sub>3</sub>O<sub>8</sub> cathode in the 0.3-1.5V voltage range. (a) The CV curve at 0.2mV s<sup>-1</sup>. (b) Rate performance at different current densities. (c) The corresponding discharge/charge curves at different current densities. (d) Cycling performance at 0.3 A/g. (e) Cycling performance at 3.0 A/g. (f) CV curves at different scan rates (0.2-2.0mV s<sup>-1</sup>). (g) log(*i*) and log(*v*) curves at specific peak currents extracted from the CV scans of NaV<sub>3</sub>O<sub>8</sub>. (h) The GITT curve at 1A/g and the corresponding diffusivity coefficients of Zn<sup>2+</sup>.

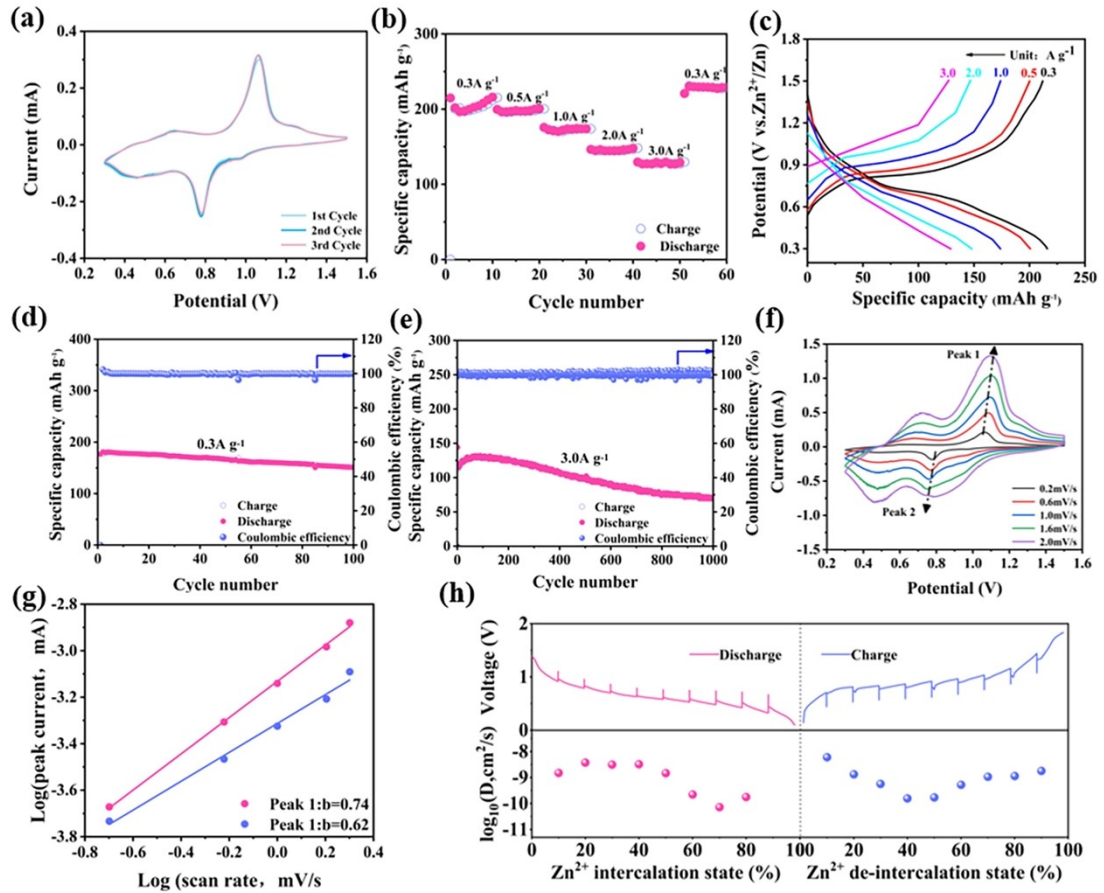

**Fig. S5** Electrochemical characterization of the  $KV_3O_8$  cathode in the 0.3-1.5V voltage range. (a) The CV curve at  $0.2 \text{ mV s}^{-1}$ . (b) Rate performance at different current densities. (c) The corresponding discharge/charge curves at different current densities. (d) Cycling performance at  $0.3 \text{ A/g}$ . (e) Cycling performance at  $3.0 \text{ A/g}$ . (f) CV curves at different scan rates ( $0.2\text{-}2.0 \text{ mV s}^{-1}$ ). (g)  $\log(i)$  and  $\log(v)$  curves at specific peak currents extracted from the CV scans of  $KV_3O_8$ . (h) The GITT curve at  $1 \text{ A/g}$  and the corresponding diffusivity coefficients of  $\text{Zn}^{2+}$ .

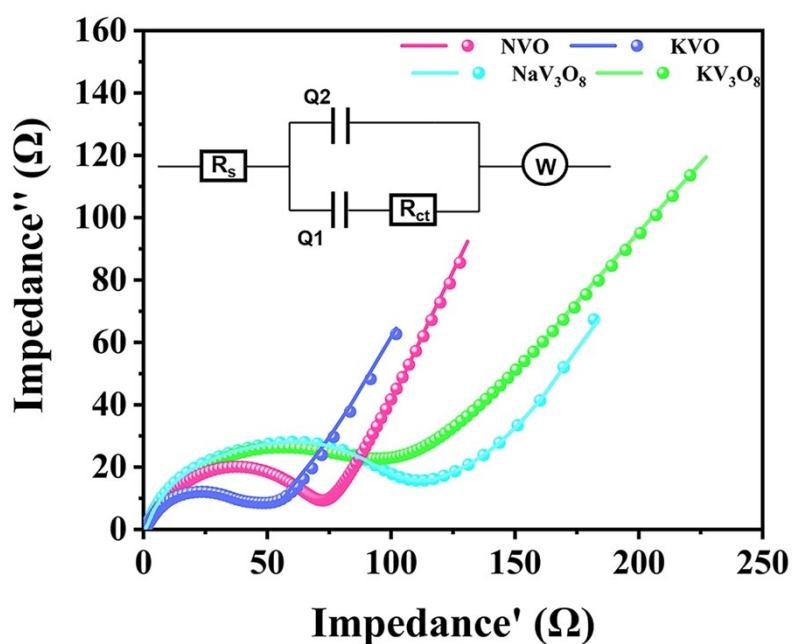

Fig. S6 The EIS of the NVO, KVO, NaV<sub>3</sub>O<sub>8</sub>, and KV<sub>3</sub>O<sub>8</sub> electrodes.

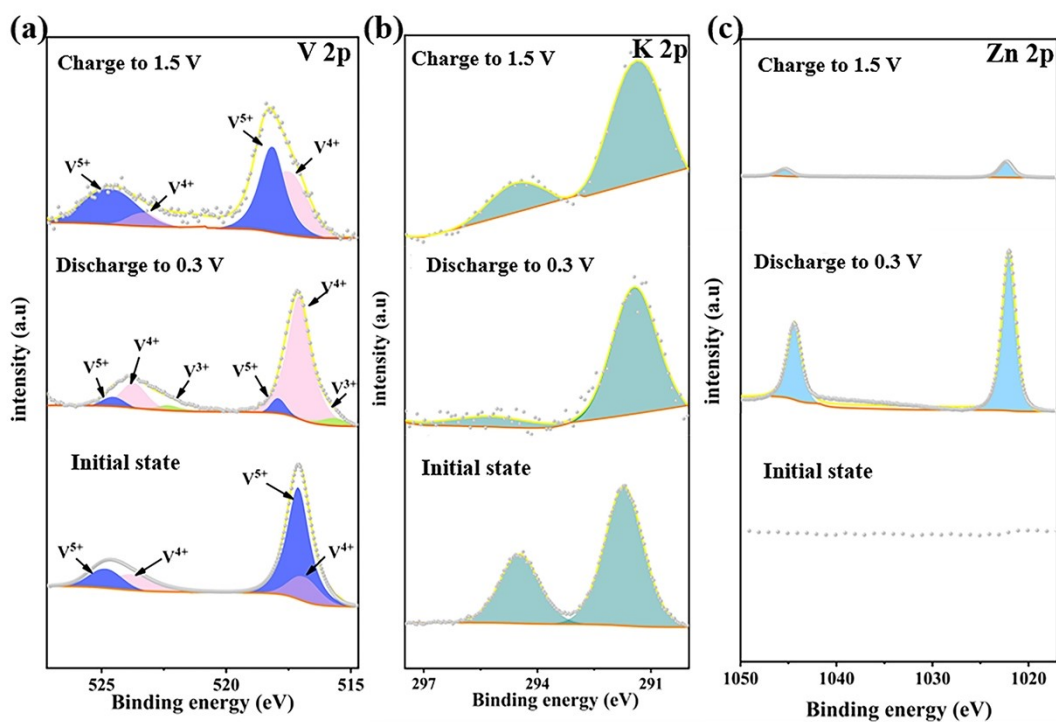

Fig. S7 High-resolution ex-situ XPS spectrum of (a) V 2p, (b) K 2p and (c) Zn 2p for KVO. In (a), (b), and (c) the spectrum from the bottom up corresponds to the initial state, discharge to 0.3 V, and charge to 1.5 V.
